# Supplementary material for: Andrographolide attenuates LPS-stimulated up-regulation of C-C and C-X-C motif chemokines in rodent cortex and primary astrocytes
Source: Springer Nature journal article supplement (doi:10.1186/s12974-016-0498-6), 2016-02-09
Supplement: MOESM1 [file 9769056]

## Andrographolide attenuates LPS-stimulated up-regulation of C-C and C-X-C motif chemokines in rodent cortex and primary astrocytes

*Siew Ying Wong, Michelle G.K. Tan, William A. Banks, W.S. Fred Wong, Peter T.-H. Wong, Mitchell K.P. Lai*

### Supplementary Fig. 1

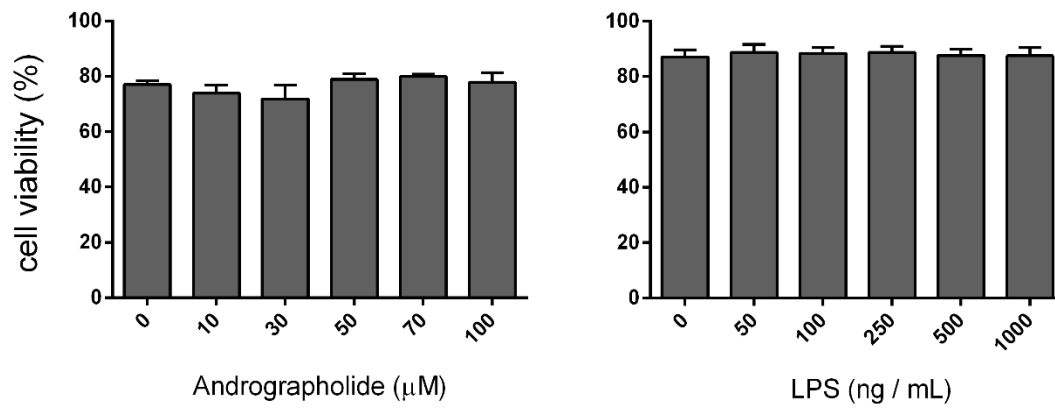

Cell viability of primary astrocytes (in mean  $\pm$  S.E.M. % of untreated) after 48 h incubation with andrographolide and LPS at the indicated concentrations.
